# Supplementary material for: A comparison of hydroponic and soil-based screening methods to identify salt tolerance in the field in barley
Source: PubMed Central journal article supplement — J Exp Bot. 2012 Mar 21;63(10):3853–67. doi: 10.1093/jxb/ers085 (PMC3388819; doi:10.1093/jxb/ers085), 2012-03-21
Supplement: supp_ers085_00072181-file001.pdf [file supp_ers085_00072181-file001.pdf]

**Effective screening methods for salinity tolerance: pot experiments but not hydroponics are plausible models of salt tolerance in barley.**

Ehsan Tavakkoli, Foad Fatehi, Pichu Rengasamy, and Glenn K. McDonald

**SUPPLEMENTARY DATA**

**Supplementary Table S1.** The whole shoot concentrations of Na<sup>+</sup>, K<sup>+</sup> and Cl<sup>-</sup> in 60 genotypes of barley in experiment 1. Values are means (*n* = 4).

|              | Na <sup>+</sup> | Cl <sup>-</sup> | K <sup>+</sup> |
|--------------|-----------------|-----------------|----------------|
| CPI77146-32  | 2174            | 1226            | 971            |
| Tadmor       | 1613            | 1830            | 1600           |
| Buloke       | 2215            | 1518            | 1183           |
| Yarra        | 1855            | 1225            | 952            |
| Briggs       | 1229            | 1028            | 781            |
| Fleet        | 1747            | 1010            | 1299           |
| H.Spont 41.1 | 2185            | 1221            | 1027           |
| O2D/20       | 1736            | 1112            | 1534           |
| Parent16     | 1478            | 886             | 1082           |
| Keel         | 1477            | 897             | 1259           |
| Gairdner     | 2243            | 1375            | 1285           |
| Chevron      | 902             | 760             | 775            |
| WI3788       | 2151            | 1261            | 1105           |
| Flagship     | 1950            | 1057            | 1481           |
| WI4262       | 1632            | 1083            | 968            |
| Dobla        | 1879            | 1460            | 1020           |
| Dhow         | 1418            | 912             | 997            |
| Arivat       | 1361            | 1054            | 845            |
| Hindmarsh    | 1816            | 1152            | 1129           |
| Albecta      | 1813            | 1016            | 1296           |
| Vlamingh     | 1788            | 1172            | 1376           |
| Frankline    | 2425            | 1451            | 1517           |
| Parent15     | 1330            | 891             | 880            |
| Proto        | 1771            | 1069            | 1046           |
| Harmel       | 1780            | 1006            | 1324           |
| Baudin       | 1673            | 1388            | 1516           |
| YU6472       | 1466            | 1061            | 1168           |
| Maritime     | 1292            | 1011            | 1105           |
| WI3416       | 1862            | 1001            | 1395           |
| Barque73     | 1656            | 1006            | 1424           |
| Ratna        | 1316            | 972             | 1137           |
| Club Mariout | 1148            | 1012            | 874            |
| ICARDA-391   | 1283            | 957             | 868            |

|                |      |      |      |
|----------------|------|------|------|
| Sahara         | 1479 | 998  | 1206 |
| Arta           | 2181 | 1200 | 1144 |
| Mundah         | 1717 | 1014 | 1446 |
| Er/Apm         | 1453 | 993  | 1049 |
| Clipper        | 1728 | 1153 | 1168 |
| Arupo          | 1966 | 1161 | 1126 |
| CM72           | 1838 | 1004 | 1020 |
| CM67           | 1263 | 1099 | 878  |
| ICARDA-382     | 1119 | 903  | 887  |
| CPI71284-48    | 2819 | 2163 | 2023 |
| Barque         | 983  | 858  | 852  |
| WI2198         | 944  | 830  | 712  |
| Schooner       | 873  | 1050 | 816  |
| Skiff          | 863  | 840  | 672  |
| Capstan        | 1613 | 963  | 1240 |
| Egmont         | 1149 | 999  | 903  |
| Parent12       | 1327 | 1037 | 806  |
| Beecher        | 1841 | 1061 | 1427 |
| California Mar | 1470 | 1140 | 854  |
| Parent-08      | 984  | 803  | 835  |
| Sloop          | 1676 | 991  | 1081 |
| Kaputar        | 2138 | 1440 | 680  |
| Gerbel         | 1403 | 946  | 2209 |
| Parent19       | 1864 | 1838 | 2550 |
| Halycon        | 1647 | 1029 | 1176 |
| CI-3576        | 1093 | 841  | 1295 |

**Supplementary Table S2.** The dry matter production of 15 genotypes of barley (experiment 2) in control conditions and in two levels of soil salinity (ECe = 7.2 and 15.3 dS m<sup>-1</sup>) at three harvests. Values are means (*n* = 3).

|                | Control | EC1  | EC1 | EC2  | EC2 |
|----------------|---------|------|-----|------|-----|
|                | DW      | DW   | ST  | DW   | ST  |
| First harvest  |         |      |     |      |     |
| Fleet          | 3.73    | 2.96 | 79  | 2.55 | 68  |
| Flagship       | 2.23    | 2.12 | 95  | 1.63 | 73  |
| Buloke         | 2.44    | 2.34 | 96  | 2.32 | 95  |
| Hindmarsh      | 2.32    | 1.90 | 82  | 1.58 | 68  |
| WI4263         | 3.06    | 2.55 | 83  | 2.15 | 70  |
| Schooner       | 3.01    | 2.85 | 95  | 2.78 | 92  |
| P19            | 3.01    | 2.60 | 86  | 2.32 | 77  |
| Gairdner       | 2.46    | 2.08 | 85  | 1.62 | 66  |
| ODZ20          | 3.53    | 3.03 | 86  | 2.52 | 71  |
| Yara           | 3.25    | 2.85 | 88  | 1.91 | 59  |
| SloopSA        | 3.40    | 3.01 | 89  | 2.88 | 85  |
| Maritime       | 3.21    | 3.05 | 95  | 2.55 | 79  |
| Capstan        | 3.55    | 3.25 | 92  | 3.05 | 86  |
| Keel           | 3.65    | 3.01 | 82  | 2.65 | 73  |
| Baudin         | 3.15    | 2.75 | 87  | 2.71 | 86  |
| Second harvest |         |      |     |      |     |
| Fleet          | 8.44    | 7.06 | 84  | 6.85 | 81  |
| Flagship       | 10.16   | 7.12 | 70  | 6.94 | 68  |
| Buloke         | 8.79    | 6.66 | 76  | 6.64 | 76  |
| Hindmarsh      | 5.67    | 5.03 | 89  | 4.91 | 87  |
| WI4263         | 6.38    | 5.91 | 93  | 4.93 | 77  |
| Schooner       | 8.21    | 6.72 | 82  | 3.95 | 48  |
| P19            | 7.91    | 5.85 | 74  | 4.85 | 61  |
| Gairdner       | 6.51    | 5.15 | 79  | 4.05 | 62  |
| ODZ20          | 6.24    | 4.98 | 80  | 4.81 | 77  |
| Yara           | 8.44    | 6.85 | 81  | 5.37 | 64  |
| SloopSA        | 7.55    | 5.15 | 68  | 4.85 | 64  |
| Maritime       | 8.15    | 5.05 | 62  | 4.85 | 60  |
| Capstan        | 7.32    | 6.25 | 85  | 5.85 | 80  |
| Keel           | 7.88    | 5.15 | 65  | 5.05 | 64  |
| Baudin         | 6.33    | 4.05 | 64  | 3.15 | 50  |
| Third harvest  |         |      |     |      |     |
| Fleet          | 14.9    | 10.5 | 71  | 9.1  | 61  |
| Flagship       | 12.6    | 6.8  | 54  | 6.5  | 52  |
| Buloke         | 11.6    | 7.5  | 65  | 6.8  | 59  |
| Hindmarsh      | 12.5    | 10.1 | 81  | 8.9  | 71  |
| WI4263         | 9.6     | 8.5  | 89  | 8.1  | 84  |

|          |      |      |    |      |    |
|----------|------|------|----|------|----|
| Schooner | 11.6 | 6.8  | 59 | 5.8  | 50 |
| P19      | 10.1 | 8.9  | 88 | 6.5  | 64 |
| Gairdner | 9.5  | 6.4  | 67 | 5.6  | 59 |
| ODZ20    | 13.9 | 10.9 | 78 | 10.5 | 75 |
| Yara     | 16.2 | 9.9  | 61 | 7.8  | 48 |
| SloopSA  | 9.9  | 6.5  | 66 | 5.0  | 51 |
| Maritime | 12.2 | 6.8  | 56 | 5.2  | 43 |
| Capstan  | 15.1 | 13.1 | 87 | 10.5 | 70 |
| Keel     | 14.6 | 10.9 | 75 | 8.8  | 60 |
| Baudin   | 10.6 | 6.1  | 58 | 5.1  | 48 |

**Supplementary Table S3.** The grain yield ( $\text{kg ha}^{-1}$ ), leaf osmotic potential (OP) and leaf Na, Cl and K concentration ( $\text{mmol kg}^{-1}$  DW) of barley varieties grown at Hart site in 2009. The results for leaf OP and ion concentrations are from youngest emerged leaves at ZGS 65. Values are averages ( $n=4$ ).

|           | grain yield | OP   | Na  | Cl  | K   |
|-----------|-------------|------|-----|-----|-----|
| Maritime  | 2988        | 1.65 | 556 | 689 | 665 |
| Schooner  | 3132        | 1.61 | 455 | 615 | 685 |
| Flagship  | 3355        | 1.63 | 415 | 675 | 695 |
| Baudin    | 3792        | 1.68 | 450 | 580 | 655 |
| Gairdner  | 3813        | 1.53 | 465 | 577 | 678 |
| SloopSA   | 3820        | 1.58 | 395 | 550 | 665 |
| Yarra     | 3990        | 1.45 | 420 | 568 | 670 |
| Buloke    | 4001        | 1.38 | 425 | 560 | 615 |
| Keel      | 4105        | 1.62 | 455 | 585 | 645 |
| Hindmarsh | 4355        | 1.18 | 365 | 480 | 633 |
| WI4262    | 4545        | 1.15 | 370 | 485 | 690 |
| Fleet     | 4755        | 1.39 | 361 | 465 | 625 |
| Capstan   | 4985        | 1.21 | 345 | 470 | 677 |
